# Supplementary material
Source: HighWire-hosted journal article supplement (http://www.qdcxjkg.com/highwire/filestream/113488/field_highwire_adjunct_files/0/ERJ-01803-2012_supplementarytables_CLEAN_COPY.pdf)
Supplement: ERJ-01803-2012_supplementarytables_CLEAN_COPY.pdf [file ERJ-01803-2012_supplementarytables_CLEAN_COPY.pdf]

Supplementary Table 1. General characteristics of the 1,750 patients admitted at hospital for AECOPD according to their status 48 months later: Dead, No (N=963; 55%) or Yes (N=787; 45%).

| Characteristics                 | Dead        |             | RR     | Relative Risk<br>[95% CI] | P value |
|---------------------------------|-------------|-------------|--------|---------------------------|---------|
|                                 | No<br>N %   | Yes<br>N %  |        |                           |         |
| <b>Sex</b>                      | 963         | 787         |        |                           |         |
| Female (n=406)                  | 60.8        | 39.2        | 1*     |                           |         |
| Male (n=1,344)                  | 53.3        | 46.7        | 1.19   | [1.0 - 1.41]              | .05     |
| <b>Age</b>                      | 963         | 787         |        |                           |         |
| <60 years (n=353)               | 74.8        | 25.2        | 1      |                           |         |
| ≥60 and <80 years (n=1,005)     | 55.4        | 44.6        | 2.04   | [1.62 - 2.56]             | <.0001  |
| ≥80 years (n=392)               | 36.2        | 63.8        | 3.54   | [2.78 - 4.51]             | <.0001  |
| <b>BMI</b>                      | 937         | 755         |        |                           |         |
| ≤20 kg/m <sup>2</sup> (n=339)   | 48.4        | 51.6        | 1.42   | [1.17 - 1.72]             | .0004   |
| 20-25 kg/m <sup>2</sup> (n=582) | 54.1        | 45.9        | 1      |                           |         |
| 25-30 kg/m <sup>2</sup> (n=456) | 58.1        | 41.9        | 0.84   | [0.70 - 1.01]             | .07     |
| ≥30 kg/m <sup>2</sup> (n=315)   | 61.3        | 38.7        | 0.87   | [0.71 - 1.08]             | .22     |
| <b>Smoking status</b>           | 963         | 787         |        |                           |         |
| Non smoker (n=116)              | 52.6        | 47.4        | 1      |                           |         |
| Former smoker (n=1,060)         | 49.4        | 50.6        | 1.20   | [0.90 - 1.59]             | .22     |
| Current smoke (n=574)           | 65.9        | 34.1        | 1.09   | [0.79 - 1.49]             | .59     |
| <b>Cumulative smoking</b>       | 882         | 703         |        |                           |         |
| Mean+/-SD (pack-year)           | 42.0+/-25.3 | 45.0+/-25.0 | 0.0137 | [0.99 - 1.05]             | .15     |
| <b>Comorbidities</b>            | 963         | 787         |        |                           |         |
| <b>Asthma</b>                   |             |             |        |                           |         |
| No (n=1,518)                    | 53.9        | 46.1        | 1      |                           |         |
| Yes (n=232)                     | 62.5        | 37.5        | 0.81   | [0.65 - 1.01]             | .06     |

|                                         |      |      |      |               |  |        |
|-----------------------------------------|------|------|------|---------------|--|--------|
| Bronchiectasis                          |      |      |      |               |  |        |
| No (n=1,630)                            | 55.2 | 44.8 | 1    |               |  |        |
| Yes (n=120)                             | 53.3 | 46.7 | 1.06 | [0.81 - 1.40] |  | .66    |
| GERD                                    |      |      |      |               |  |        |
| No (n=1,670)                            | 54.2 | 45.8 | 1    |               |  |        |
| Yes (n=80)                              | 72.5 | 27.5 | 0.55 | [0.36 - 0.84] |  | .006   |
| Secondary pulmonary hypertension        |      |      |      |               |  |        |
| No (n=1,623)                            | 56.8 | 43.3 | 1    |               |  |        |
| Yes (n=127)                             | 33.1 | 66.9 | 1.93 | [1.54 - 2.41] |  | <.0001 |
| Chronic right ventricular failure       |      |      |      |               |  |        |
| No (n=1,676)                            | 56.0 | 44.0 | 1    |               |  |        |
| Yes (n=74)                              | 32.4 | 67.6 | 1.89 | [1.42 - 2.52] |  | <.0001 |
| Hypertension                            |      |      |      |               |  |        |
| No (n=1,133)                            | 57.5 | 42.5 | 1    |               |  |        |
| Yes (n=617)                             | 50.6 | 49.4 | 1.05 | [0.90 - 1.21] |  | .55    |
| Sleep apnoea                            |      |      |      |               |  |        |
| No (n=1,617)                            | 54.5 | 45.5 | 1    |               |  |        |
| Yes (n=133)                             | 61.6 | 38.4 | 0.86 | [0.65 - 1.15] |  | .31    |
| Obesity hypoventilation syndrome        |      |      |      |               |  |        |
| No (n=1,656)                            | 55.0 | 45.0 | 1    |               |  |        |
| Yes (n=94)                              | 55.3 | 44.7 | 1.18 | [0.86 - 1.61] |  | .30    |
| Lung cancer                             |      |      |      |               |  |        |
| No (n=1,703)                            | 55.7 | 44.3 | 1    |               |  |        |
| Yes (n=47)                              | 29.8 | 70.2 | 1.66 | [1.17 - 2.35] |  | .005   |
| Cardiovascular comorbidity <sup>†</sup> |      |      |      |               |  |        |
| No (n=1,224)                            | 962  | 787  | 60.3 |               |  |        |
| Yes (n=525)                             | 42.7 | 57.3 | 1.39 | [1.20 - 1.62] |  | <.0001 |
| COPD                                    |      |      |      |               |  |        |
| Unknown at inclusion (n=279)            | 963  | 787  | 76.7 |               |  |        |
| Known at inclusion (n=1,471)            | 50.9 | 49.1 | 2.25 | [1.75 - 2.91] |  | <.0001 |

AECOPD=acute exacerbation of COPD; BMI=body mass index; CI=confidence interval; COPD=chronic obstructive pulmonary disease; GERD=gastro-oesophageal reflux; SD=standard deviation; RR=relative risk

\* 1=reference; <sup>†</sup> Ischemic heart disease, congestive heart failure

Supplementary Table 2. Characteristics of the COPD of the 1,750 patients admitted at hospital for AECOPD, according to their status 48 months later: Dead, No (N=963; 55%) or Yes (N=787; 45%).

| Characteristics                             | Dead      |            | RR   | Relative Risk |         |
|---------------------------------------------|-----------|------------|------|---------------|---------|
|                                             | No<br>N % | Yes<br>N % |      | [95% CI]      | P value |
| Dyspnoea score (MRC)                        | 951       | 775        |      |               |         |
| 0/1 (n=293)                                 | 75.8      | 24.2       | 1*   |               |         |
| 2 (n=625)                                   | 62.9      | 37.2       | 1.37 | [1.05 - 1.79] | .02     |
| 3 (n=595)                                   | 46.4      | 53.6       | 2.21 | [1.71 - 2.87] | <.0001  |
| 4 (n=213)                                   | 28.2      | 71.8       | 3.94 | [2.97 - 5.24] | <.0001  |
| Last respiratory function test <sup>†</sup> |           |            |      |               |         |
| FEV <sub>1</sub> (% predicted value)        | 845       | 704        |      |               |         |
| ≥80% (n=71)                                 | 73.2      | 26.8       | 1    |               |         |
| 50%-80% (n=511)                             | 61.5      | 38.5       | 1.00 | [0.79 - 1.27] | .99     |
| 30%-50% (n=671)                             | 52.5      | 47.5       | 1.42 | [1.13 - 1.77] | .002    |
| ≤30% (n=296)                                | 42.9      | 57.1       | 2.27 | [1.76 - 2.92] | <.0001  |
| FEV <sub>1</sub> /FVC                       |           |            |      |               |         |
| ≥70% (n=174)                                | 58.6      | 41.4       | 1    |               |         |
| <70% (n=1,347)                              | 54.0      | 46.0       | 1.19 | [0.93 - 1.53] | .16     |
| PaCO <sub>2</sub>                           | 705       | 669        |      |               |         |
| <45 mmHg (n=896)                            | 55.9      | 44.1       | 1    |               |         |
| ≥45 mmHg (n=478)                            | 42.7      | 57.3       | 1.62 | [1.38 - 1.89] | <.0001  |
| PaO <sub>2</sub>                            | 709       | 673        |      |               |         |
| ≥60 mmHg (n=1,038)                          | 56.1      | 43.9       | 1    |               |         |
| >60 mmHg (n=3,44)                           | 36.9      | 63.1       | 1.84 | [1.57 - 2.17] | <.0001  |
| GOLD stage                                  | 726       | 619        |      |               |         |
| I (n=36)                                    | 72.2      | 27.8       | 0.25 | [0.13 - 0.47] | <.0001  |
| II (n=410)                                  | 61.2      | 38.8       | 0.43 | [0.34 - 0.54] | <.0001  |
| III (n=615)                                 | 53.2      | 46.8       | 0.60 | [0.50 - 0.73] | <.0001  |
| IV (n=284)                                  | 43.0      | 57.0       | 1    |               |         |

|                                                |      |      |       |               |        |  |
|------------------------------------------------|------|------|-------|---------------|--------|--|
| Ongoing treatments                             |      |      |       |               |        |  |
| Long term oxygen therapy                       | 912  | 767  |       |               |        |  |
| No (n=1,130)                                   | 64.6 | 35.4 | 1     |               |        |  |
| Yes (n=549)                                    | 33.1 | 66.9 | 2.47  | [2.14 - 2.85] | <.0001 |  |
| Ambulatory oxygen therapy                      | 913  | 767  |       |               |        |  |
| No (n=1,468)                                   | 57.5 | 42.5 | 1     |               |        |  |
| Yes (n=212)                                    | 32.6 | 67.5 | 2.01  | [1.68 - 2.41] | <.0001 |  |
| Non-invasive ventilation                       | 913  | 767  |       |               |        |  |
| No (n=1,544)                                   | 55.5 | 44.5 | 1     |               |        |  |
| Yes (n=136)                                    | 41.2 | 58.8 | 1.67  | [1.33 - 2.11] | <.0001 |  |
| Invasive ventilation                           | 913  | 767  |       |               |        |  |
| No (n=1,672)                                   | 54.3 | 45.7 | 1     |               |        |  |
| Yes (n=8)                                      | 62.5 | 37.5 | 1.004 | [0.32 - 3.12] | .99    |  |
| Inhaled corticosteroids                        | 916  | 771  |       |               |        |  |
| No (n=559)                                     | 55.3 | 44.7 | 1     |               |        |  |
| Yes (n=1,128)                                  | 39.8 | 60.2 | 1.09  | [0.93 - 1.26] | .29    |  |
| Long term oral corticosteroids                 | 915  | 771  |       |               |        |  |
| No (n=986)                                     | 55.3 | 44.7 | 1     |               |        |  |
| Yes (n=72)                                     | 39.8 | 60.2 | 1.47  | [1.14 - 1.90] | .003   |  |
| Bronchodilators                                | 917  | 772  |       |               |        |  |
| No (n=310)                                     | 60.3 | 39.7 | 1     |               |        |  |
| Yes (n=1,379)                                  | 52.9 | 47.1 | 1.13  | [0.93 - 1.37] | .22    |  |
| Acute exacerbation(s) within the previous year |      |      |       |               |        |  |
| 0 (n=634)                                      | 952  | 773  | 66.4  | 33.6          | 1      |  |
| 1 (n=358)                                      | 54.5 | 45.5 | 1.42  | [1.15 - 1.74] | .0009  |  |
| 2 (n=344)                                      | 47.1 | 52.9 | 1.75  | [1.43 - 2.13] | <.0001 |  |
| 3 (n=170)                                      | 50.0 | 50.0 | 1.52  | [1.18 - 1.96] | .001   |  |
| ≥4 (n=219)                                     | 40.6 | 59.4 | 2.26  | [1.82 - 2.81] | <.0001 |  |

| Hospital admission for acute exacerbation(s)<br>within the previous year | 952  | 773  |      |               |        |
|--------------------------------------------------------------------------|------|------|------|---------------|--------|
| 0 (n=889)                                                                | 64.3 | 35.7 | 1    |               |        |
| 1 (n=448)                                                                | 52.5 | 47.5 | 1.41 | [1.19 - 1.68] | .0001  |
| 2 (n=206)                                                                | 41.8 | 58.2 | 1.97 | [1.60 - 2.43] | <.0001 |
| 3 (n=87)                                                                 | 35.6 | 64.4 | 2.10 | [1.58 - 2.79] | <.0001 |
| ≥4 (n=95)                                                                | 29.5 | 70.3 | 2.52 | [1.94 - 3.29] | <.0001 |

AECOPD=acute exacerbation of COPD; CI=confidence interval; COPD=chronic obstructive pulmonary disease; FEV<sub>1</sub>=forced expiratory volume in one second; FVC=forced (expiratory) vital capacity; GOLD=Global Initiative for chronic Obstructive Lung Disease; MRC=Medical Research Council; PaCO<sub>2</sub>=arterial carbon dioxide pressure; PaO<sub>2</sub>=arterial oxygen pressure; RR=relative risk

\* 1=reference; † last test performed before inclusion.

Supplementary Table 3. Characteristics of the acute exacerbation which led to hospital admission in 1,750 patients, according to the status of the patients 48 months later: Dead, No (N=963; 55%) or Yes (N=787; 45%).

| Characteristics             | Dead      |            | RR   | Relative Risk |         |
|-----------------------------|-----------|------------|------|---------------|---------|
|                             | No<br>N % | Yes<br>N % |      | [95% CI]      | P value |
| <b>Aetiology</b>            |           |            |      |               |         |
| Infectious cause            | 962       | 787        |      |               |         |
| No (n=358)                  | 49.7      | 50.3       | 1*   |               |         |
| Yes (n=1,391)               | 56.4      | 43.6       | 0.79 | [0.67 - 0.94] | .006    |
| Left heart failure          | 962       | 787        |      |               |         |
| No (n=1,611)                | 56.7      | 43.3       | 1    |               |         |
| Yes (n=138)                 | 35.5      | 64.5       | 1.63 | [1.31 - 2.04] | <.0001  |
| <b>Dyspnoea score (MRC)</b> |           |            |      |               |         |
|                             | 900       | 744        |      |               |         |
| 1 (n=45)                    | 82.2      | 17.8       | 1    |               |         |
| 2 (n=143)                   | 69.2      | 30.8       | 1.70 | [0.80 - 3.62] | .17     |
| 3 (n=525)                   | 61.3      | 38.7       | 2.13 | [1.05 - 4.31] | .04     |
| 4 (n=931)                   | 47.5      | 52.5       | 3.28 | [1.63 - 6.60] | .0009   |
| <b>Functional symptoms</b>  |           |            |      |               |         |
| Dyspnoea worsening          | 962       | 787        |      |               |         |
| No (n=76)                   | 56.6      | 43.4       | 1    |               |         |
| Yes (n=1,673)               | 54.9      | 45.1       | 1.05 | [0.74 - 1.49] | .79     |
| Increased cough             | 962       | 787        |      |               |         |
| No (n=596)                  | 51.2      | 48.3       | 1    |               |         |
| Yes (n=1,153)               | 57.0      | 43.0       | 0.87 | [0.75 - 1.01] | .06     |
| Sputum change               | 962       | 787        |      |               |         |
| No (n=783)                  | 56.3      | 43.7       | 1    |               |         |
| Yes (n=966)                 | 53.9      | 46.1       | 1.06 | [0.92 - 1.22] | .42     |

|                                          |      |      |      |               |        |
|------------------------------------------|------|------|------|---------------|--------|
| Severity signs within the first 24 hours | 962  | 787  |      |               |        |
| - Number                                 |      |      |      |               |        |
| 0 (n=215)                                | 66.1 | 33.9 | 1    |               |        |
| 1 (n=355)                                | 60.3 | 39.7 | 1.24 | [0.93 - 1.64] | .14    |
| 2 (n=333)                                | 59.5 | 40.5 | 1.19 | [0.89 - 1.58] | .24    |
| ≥3 (n=846)                               | 48.2 | 51.8 | 1.95 | [1.52 - 2.50] | <.0001 |
| - Nature                                 |      |      |      |               |        |
| Dyspnoea at rest                         | 962  | 787  |      |               |        |
| No (n=429)                               | 62.0 | 38.0 | 1    |               |        |
| Yes (n=1,320)                            | 52.7 | 47.3 | 1.35 | [1.14 - 1.61] | .0006  |
| Cyanosis                                 | 962  | 787  |      |               |        |
| No (n=1,367)                             | 57.1 | 42.9 | 1    |               |        |
| Yes (n=382)                              | 47.4 | 52.6 | 1.39 | [1.18 - 1.63] | <.0001 |
| SpO2 <90                                 | 962  | 787  |      |               |        |
| No (n=988)                               | 58.5 | 41.5 | 1    |               |        |
| Yes (n=761)                              | 50.5 | 49.5 | 1.35 | [1.17 - 1.55] | <.0001 |
| Use of secondary respiratory muscles     | 962  | 787  |      |               |        |
| No (n=1,273)                             | 57.9 | 42.1 | 1    |               |        |
| Yes (n=476)                              | 47.3 | 52.7 | 1.45 | [1.25 - 1.69] | <.0001 |
| Paradoxal abdominal respiration          | 962  | 787  |      |               |        |
| No (n=1,603)                             | 56.0 | 44.0 | 1    |               |        |
| Yes (n=146)                              | 43.8 | 56.2 | 1.61 | [1.28 - 2.03] | <.0001 |
| Respiratory rate >25/min                 | 962  | 787  |      |               |        |
| No (n=1,166)                             | 57.3 | 42.7 | 1    |               |        |
| Yes (n=583)                              | 50.4 | 49.6 | 1.27 | [1.10 - 1.47] | .001   |
| Ineffective cough                        | 962  | 787  |      |               |        |
| No (n=1,514)                             | 54.6 | 45.4 | 1    |               |        |
| Yes (n=235)                              | 57.5 | 42.5 | 0.99 | [0.80 - 1.22] | .89    |
| Tachycardia >110/min                     | 962  | 787  |      |               |        |
| No (n=1,353)                             | 56.4 | 43.6 | 1    |               |        |
| Yes (n=396)                              | 50.3 | 49.8 | 1.34 | [1.14 - 1.58] | .0004  |

|                   |      |      |      |               |  |        |
|-------------------|------|------|------|---------------|--|--------|
| Arrhythmias       | 962  | 787  |      |               |  |        |
| No (n=1,687)      | 55.3 | 44.7 | 1    |               |  |        |
| Yes (n=62)        | 48.4 | 51.6 | 1.15 | [0.81 - 1.64] |  | .43    |
| Hypotension       | 962  | 787  |      |               |  |        |
| No (n=1,709)      | 55.1 | 44.9 | 1    |               |  |        |
| Yes (n=40)        | 50.0 | 50.0 | 1.44 | [0.92 - 2.25] |  | .11    |
| Blotches          | 962  | 787  |      |               |  |        |
| No (n=1,722)      | 55.1 | 44.9 | 1    |               |  |        |
| Yes (n=27)        | 48.2 | 51.8 | 1.81 | [1.06 - 3.08] |  | .03    |
| Lower-limb oedema | 962  | 787  |      |               |  |        |
| No (n=1,517)      | 58.1 | 41.9 | 1    |               |  |        |
| Yes (n=232)       | 34.9 | 65.1 | 1.91 | [1.60 - 2.28] |  | <.0001 |

CI=confidence interval; MRC=Medical Research Council; RR=relative risk; SpO<sub>2</sub>= pulse oxygen haemoglobin saturation

\* 1=reference



Supplementary Table 4. Characteristics of hospitalization for 1,750 patients admitted at hospital for AECOPD according to their status 48 months later: Dead, No (N=963; 55%) or Yes (N=787; 45%).

| Characteristics                | Dead                      |                            | RR   | Relative Risk |         |
|--------------------------------|---------------------------|----------------------------|------|---------------|---------|
|                                | No<br>N % or<br>mean+/-SD | Yes<br>N % or<br>mean+/-SD |      | [95% CI]      | P value |
| First admission                | 960                       | 787                        |      |               |         |
| Emergency department (n=1,368) | 56.4                      | 43.6                       | 1*   |               |         |
| ICU (n=110)                    | 43.6                      | 56.4                       | 1.63 | [1.25 - 2.12] | .0003   |
| Pneumology department (n=209)  | 52.2                      | 47.8                       | 1.18 | [0.95 - 1.45] | .13     |
| Other department (n=23)        | 47.8                      | 52.2                       | 1.31 | [0.74 - 2.32] | .36     |
| Other hospital (n=37)          | 54.0                      | 46.0                       | 1.20 | [0.74 - 1.94] | .47     |
| Reanimation                    | 962                       | 787                        |      |               |         |
| No (n=1,452)                   | 56.8                      | 43.2                       | 1    |               |         |
| Yes (n=297)                    | 46.1                      | 53.9                       | 1.51 | [1.27 - 1.80] | <.0001  |
| In hospital treatment          |                           |                            |      |               |         |
| Oxygen therapy                 | 962                       | 787                        |      |               |         |
| No (n=229)                     | 67.7                      | 32.3                       | 1    |               |         |
| Yes (n=1,520)                  | 53.1                      | 46.9                       | 1.62 | [1.28 - 2.06] | <.0001  |
| Ventilation                    | 962                       | 787                        |      |               |         |
| No (n=1,539)                   | 56.4                      | 43.6                       | 1    |               |         |
| Yes (n=210)                    | 44.8                      | 55.2                       | 1.63 | [1.33 - 1.98] | <.0001  |
| Antibiotics                    | 960                       | 786                        |      |               |         |
| No (n=393)                     | 54.5                      | 45.5                       | 1    |               |         |
| Yes (n=1,353)                  | 55.1                      | 44.9                       | 0.94 | [0.80 - 1.11] | .49     |
| Bronchodilators                | 961                       | 786                        |      |               |         |
| No (n=41)                      | 65.9                      | 34.1                       | 1    |               |         |
| Yes (n=1,706)                  | 54.8                      | 45.2                       | 1.44 | [0.85 - 2.45] | .17     |
| Corticosteroids <sup>†</sup>   | 961                       | 786                        |      |               |         |
| No (n=641)                     | 55.1                      | 44.9                       | 1    |               |         |
| Yes (n=1,106)                  | 55.0                      | 45.0                       | 1.07 | [0.93 - 1.24] | .37     |

|                                             |                |                     |                     |               |        |
|---------------------------------------------|----------------|---------------------|---------------------|---------------|--------|
| Hospital stay: duration (days)<br>mean+/-SD | 956 10.9+/-8.4 | 779 13.4+/-<br>10.0 | 0.0214+/-<br>0.0032 |               | <.0001 |
| Treatment at discharge                      |                |                     |                     |               |        |
| Oxygen therapy                              | 956            | 778                 |                     |               |        |
| No (n=1,080)                                | 66.9           | 33.1                | 1                   |               |        |
| Yes (n=654)                                 | 35.8           | 64.2                | 2.51                | [2.18 - 2.89] | <.0001 |
| Non-invasive ventilation                    | 956            | 778                 |                     |               |        |
| No (n=1,560)                                | 56.0           | 44.0                | 1                   |               |        |
| Yes (n=174)                                 | 47.1           | 52.9                | 1.42                | [1.14 - 1.76] | .002   |
| Bronchodilators                             | 956            | 778                 |                     |               |        |
| No (n=105)                                  | 57.1           | 42.9                | 1                   |               |        |
| Yes (n=1,629)                               | 55.0           | 45.0                | 1.05                | [0.77 - 1.41] | .78    |
| Inhaled corticosteroids                     | 956            | 778                 |                     |               |        |
| No (n=476)                                  | 55.3           | 44.7                | 1                   |               |        |
| Yes (n=1,258)                               | 55.1           | 44.9                | 0.98                | [0.83 - 1.14] | .77    |
| Systemic corticosteroids <sup>‡</sup>       | 956            | 778                 |                     |               |        |
| No (n=1,225)                                | 55.8           | 44.2                | 1                   |               |        |
| Yes (n=509)                                 | 53.4           | 46.6                | 1.19                | [1.02 - 1.39] | .03    |
| Antibiotics                                 | 956            | 778                 |                     |               |        |
| No (n=1,267)                                | 53.1           | 46.9                | 1                   |               |        |
| Yes (n=467)                                 | 60.6           | 39.4                | 0.79                | [0.67 - 0.94] | .006   |
| Physiotherapy                               | 956            | 778                 |                     |               |        |
| No (n=1,387)                                | 57.0           | 43.0                | 1                   |               |        |
| Yes (n=347)                                 | 47.8           | 52.2                | 1.39                | [1.17 - 1.64] | .0001  |

AECOPD=acute exacerbation of COPD; CI=confidence interval; COPD=Chronic obstructive pulmonary disease; ICU=intensive care unit; RR=relative risk; SD=standard deviation

\* 1= reference; <sup>†</sup> *per os* or intravenous; <sup>‡</sup> *per os*
